# Supplementary material
Source: PubMed Central journal article supplement (PMC4556003)

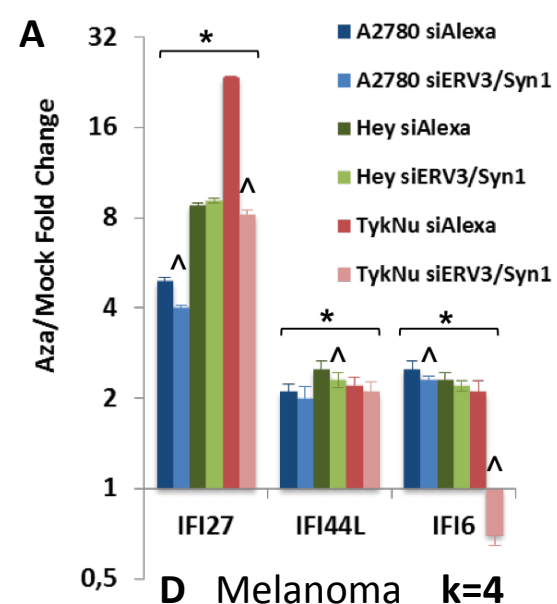

**B Ovarian Cancer**

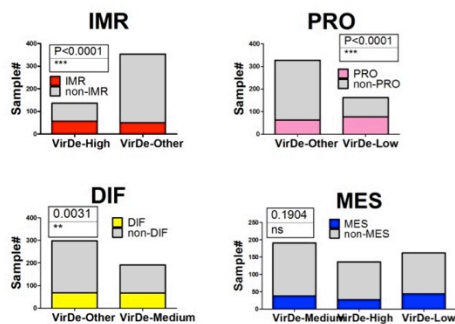

**C Colorectal Cancer k=4**

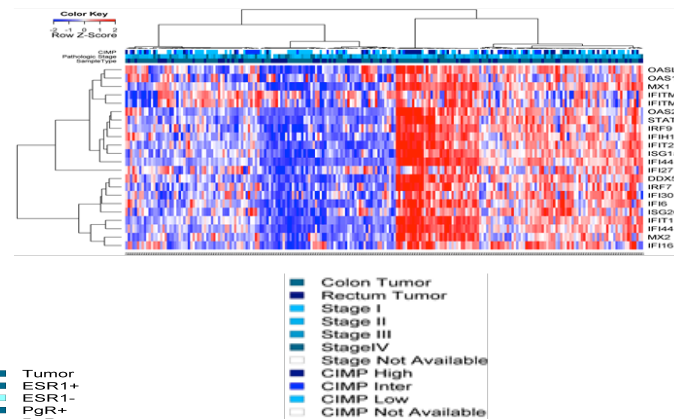

**TCGA Colorectal CIMP status vs clusters**

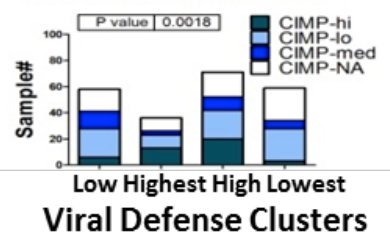

**D Melanoma k=4**

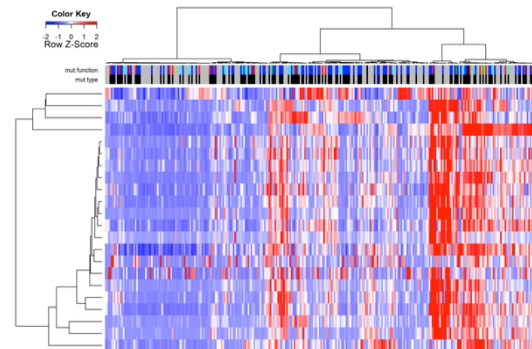

**E Breast Cancer k=3**

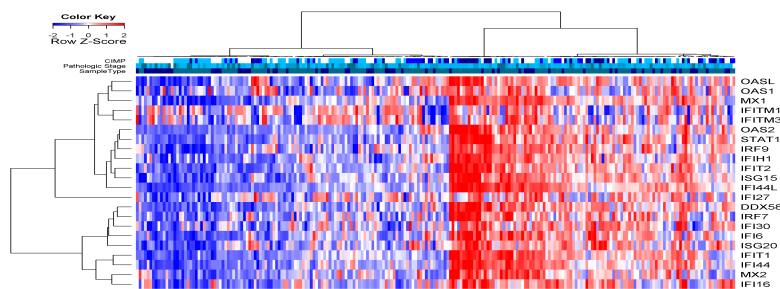

**F Lung Cancer k=2**

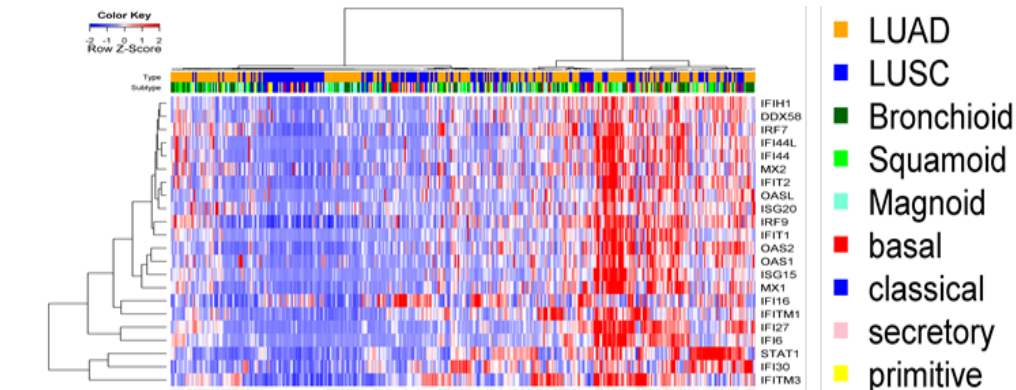

**G**

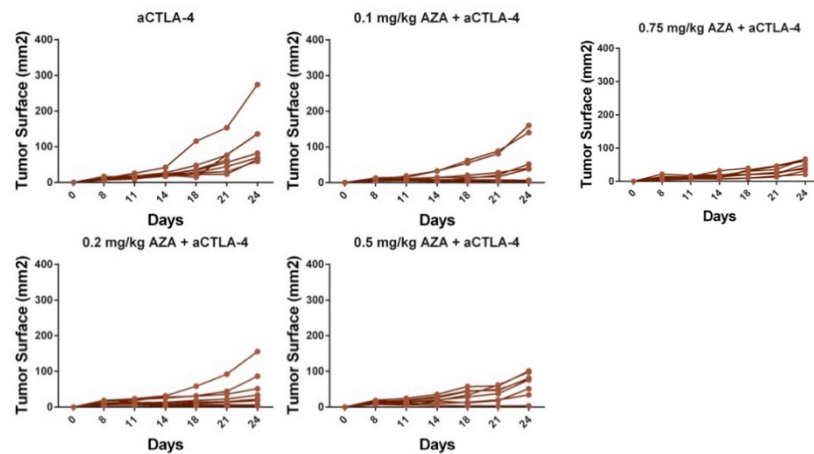

Supplement: NIHMS707501-supplement-7.pdf [file NIHMS707501-supplement-7.pdf]
