# Supplementary material
Source: PubMed Central journal article supplement (PMC4556003)

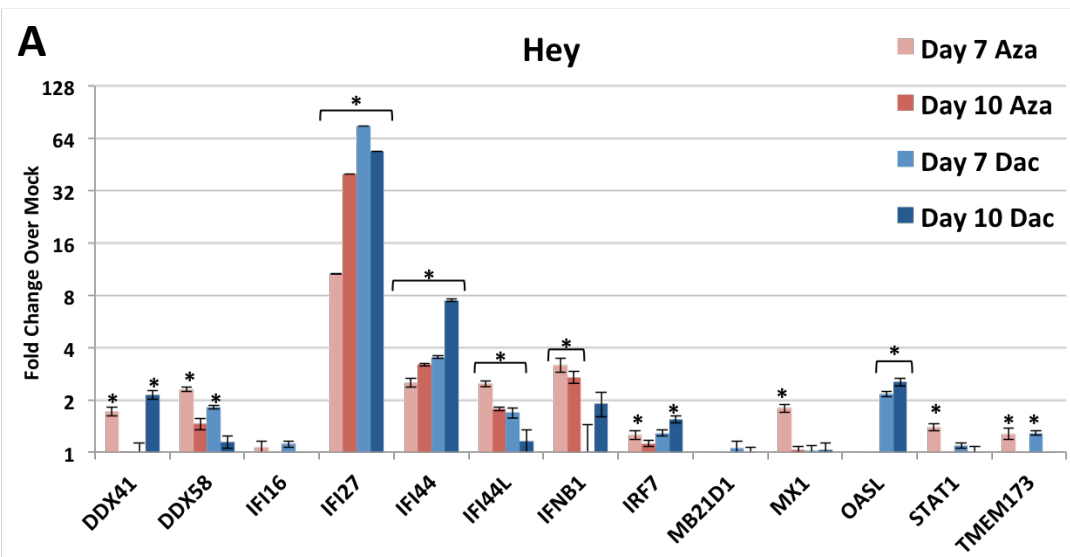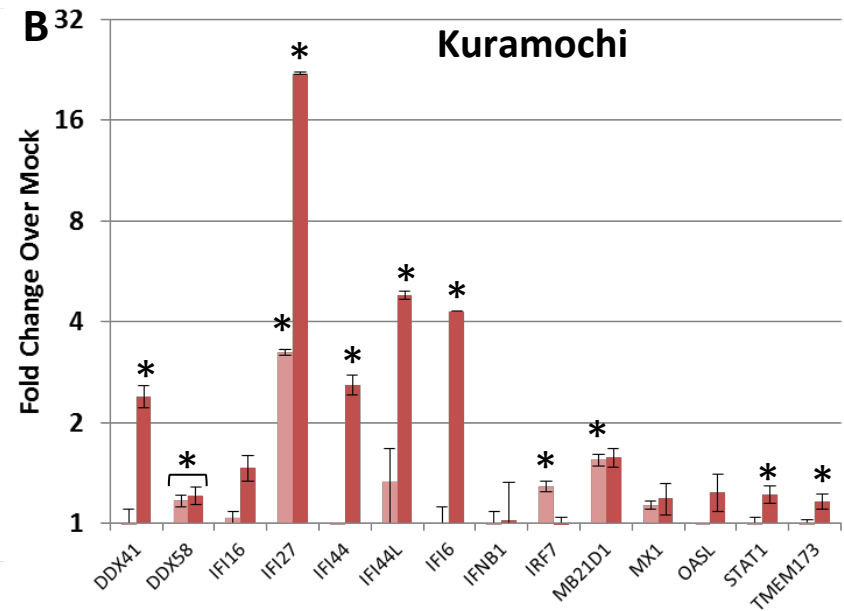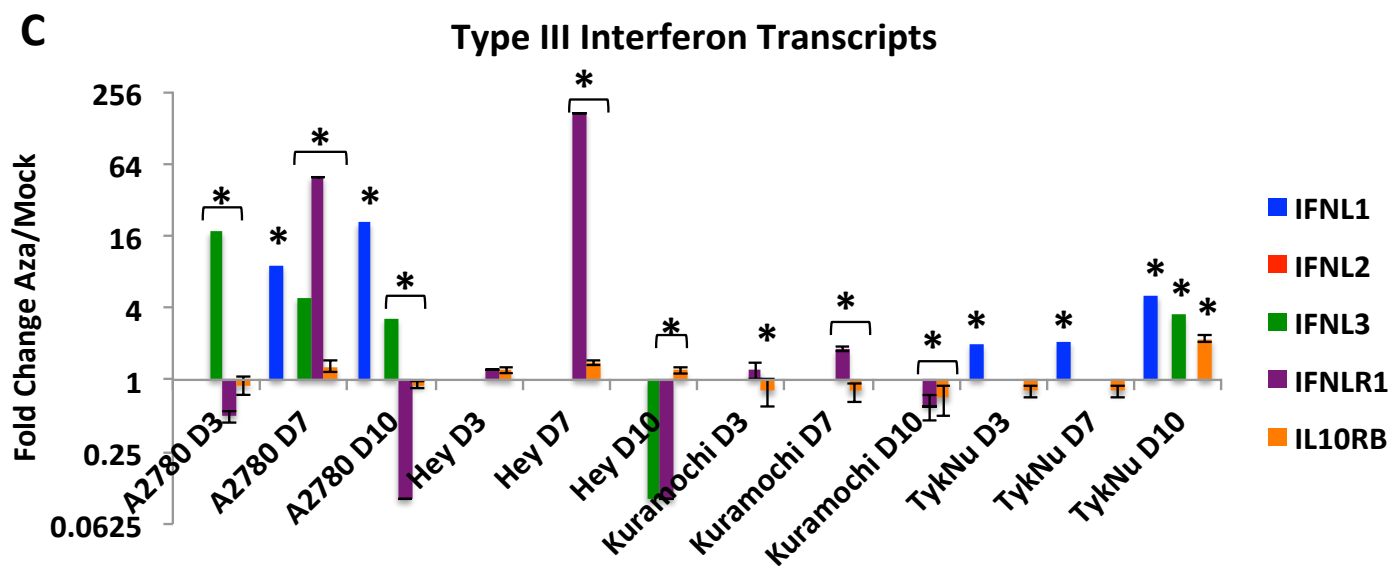

Supplement: NIHMS707501-supplement-1.pdf [file NIHMS707501-supplement-1.pdf]

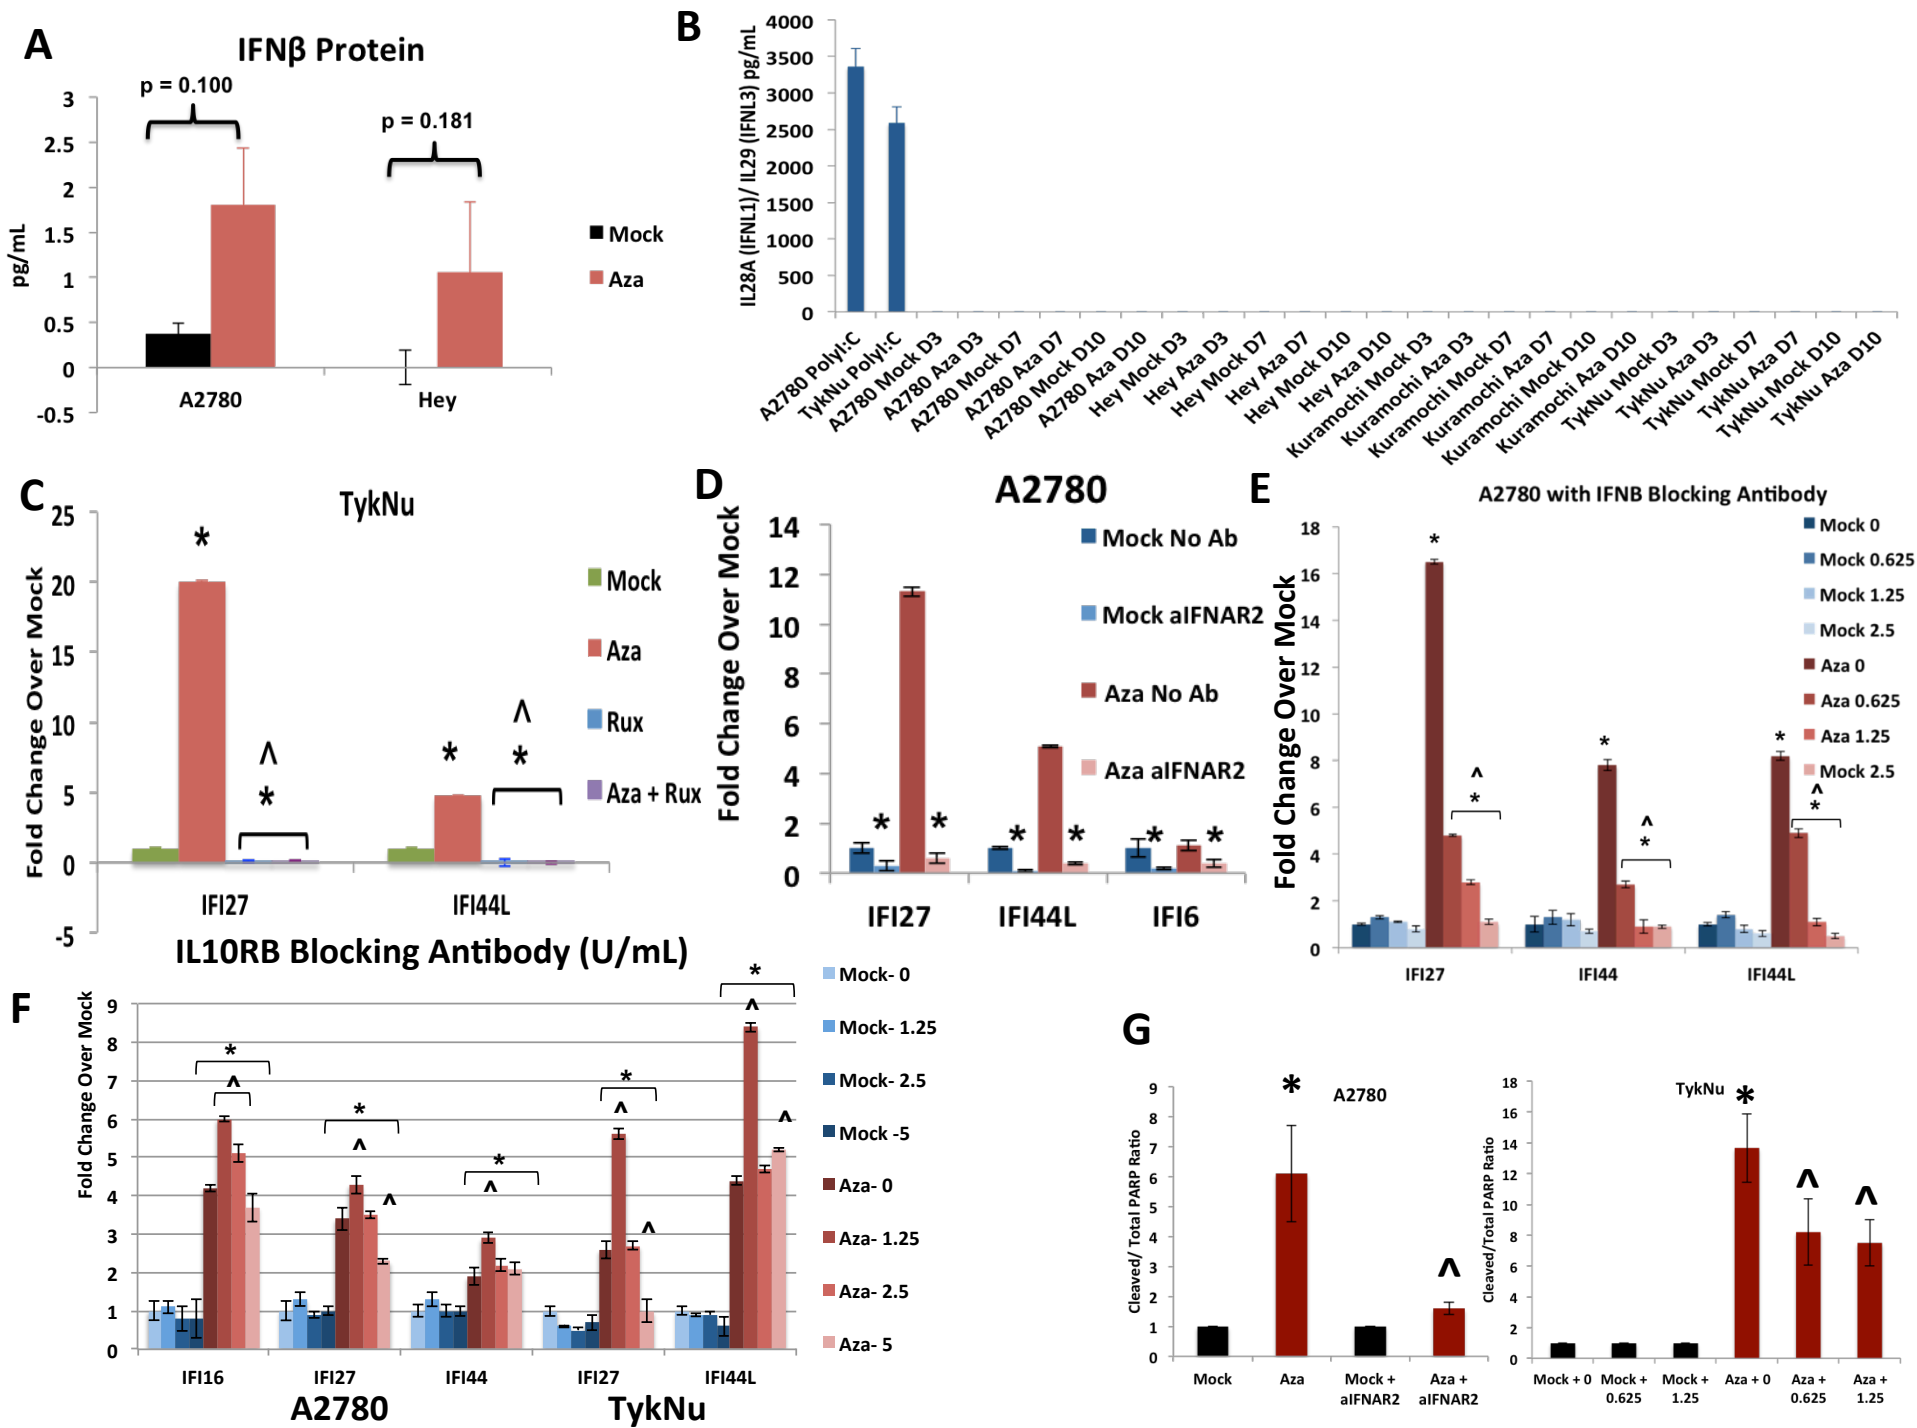

Supplement: NIHMS707501-supplement-2.pdf [file NIHMS707501-supplement-2.pdf]

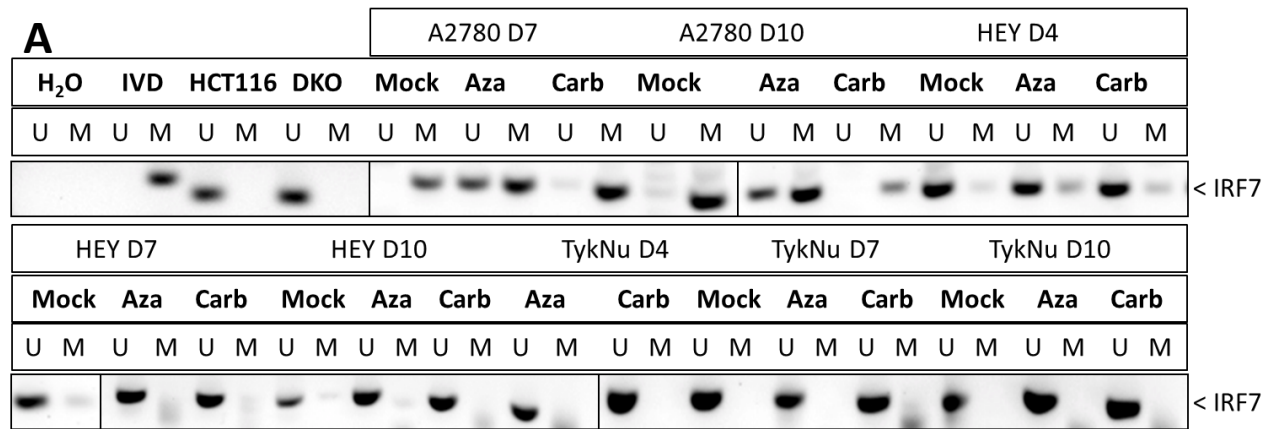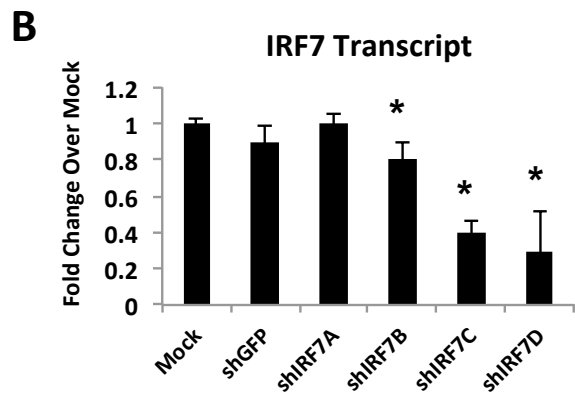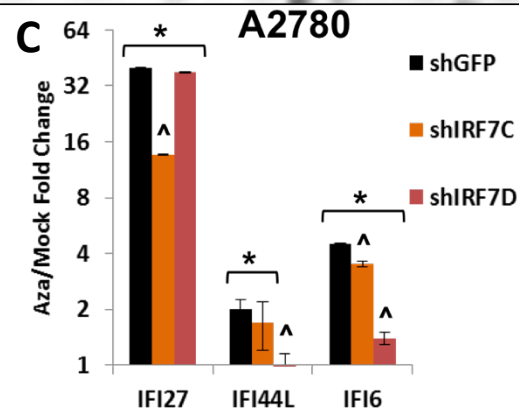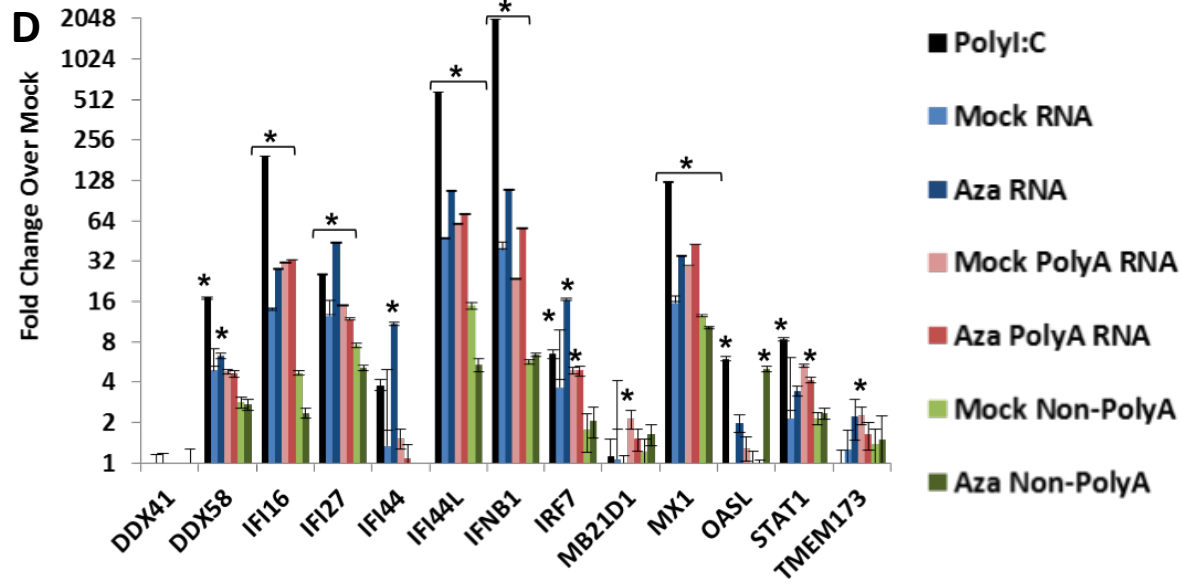

Supplement: NIHMS707501-supplement-3.pdf [file NIHMS707501-supplement-3.pdf]

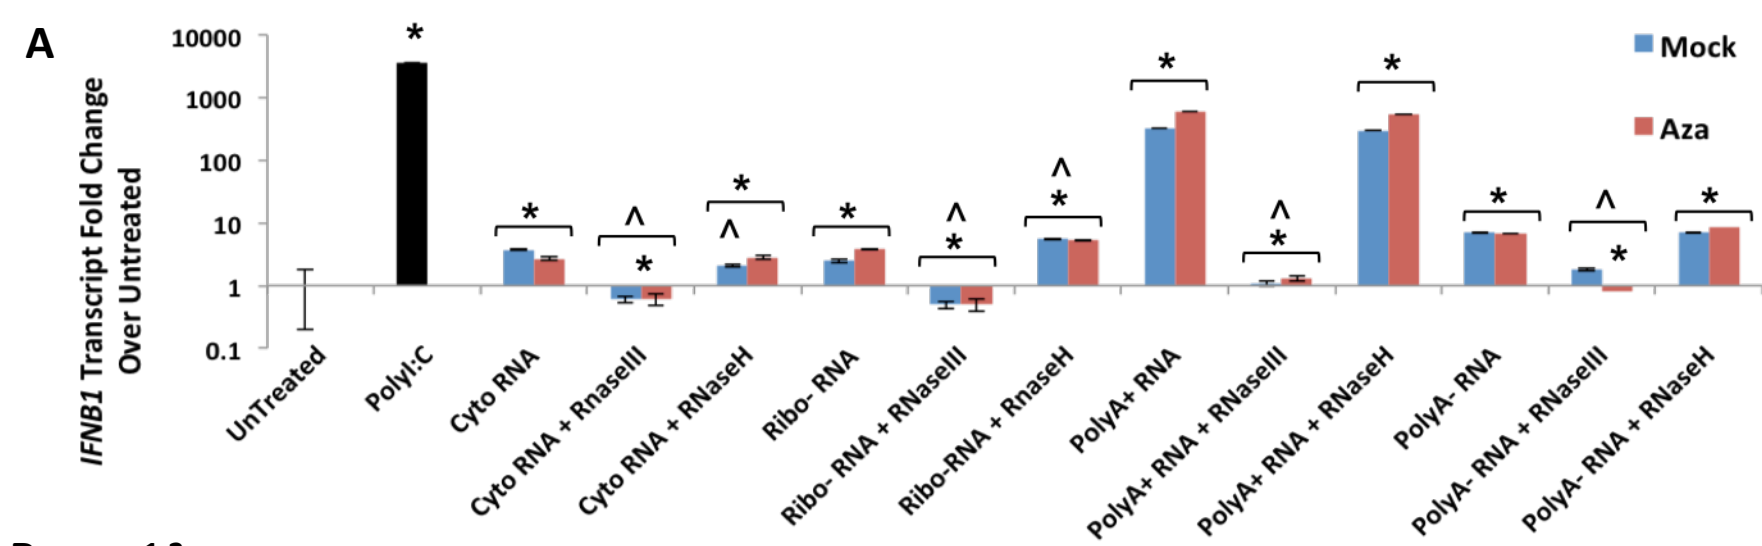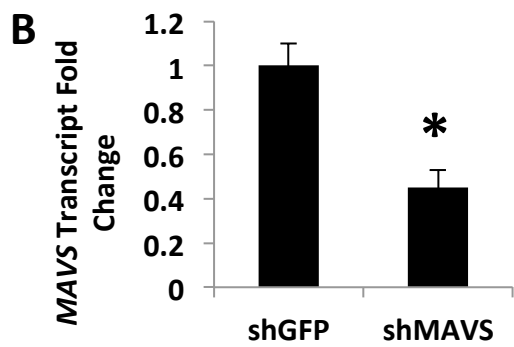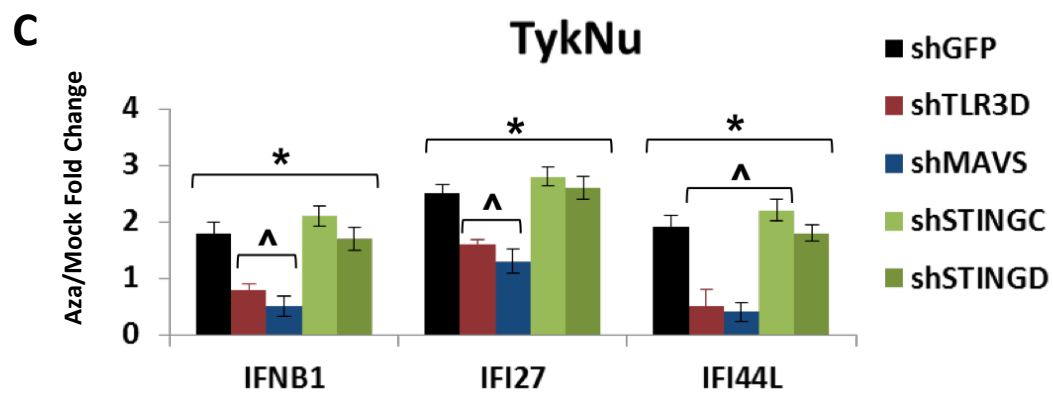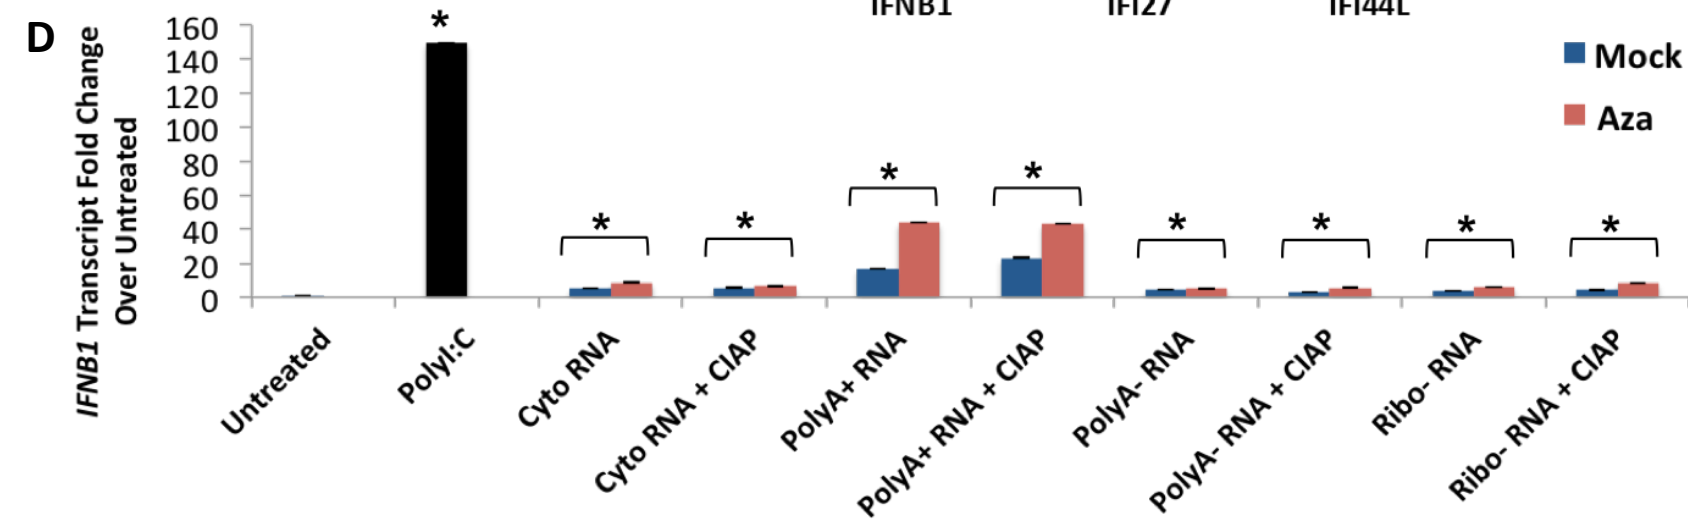

Supplement: NIHMS707501-supplement-4.pdf [file NIHMS707501-supplement-4.pdf]

A

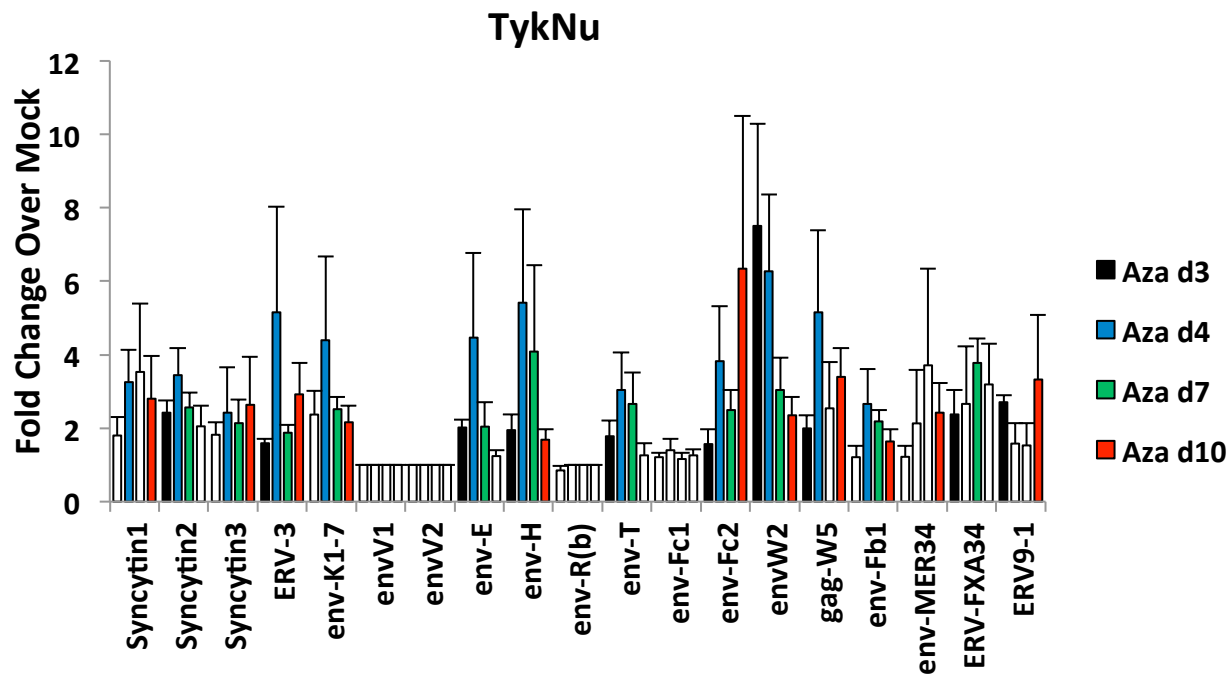

B

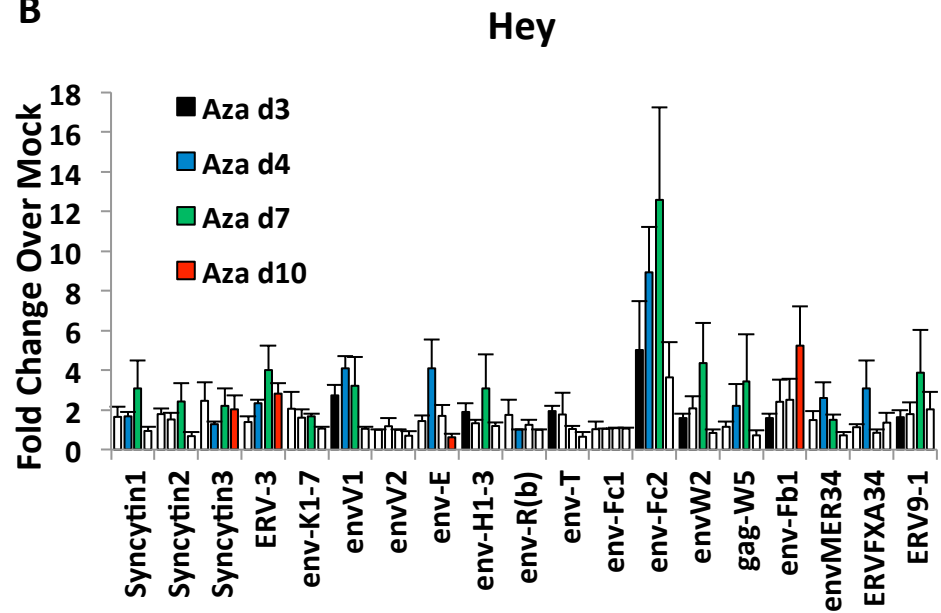

C

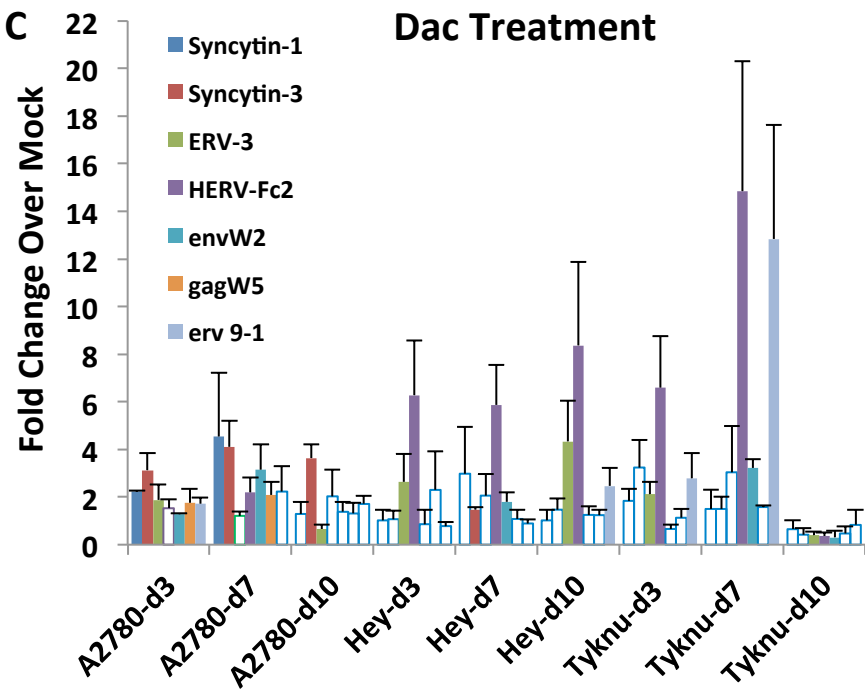

Supplement: NIHMS707501-supplement-5.pdf [file NIHMS707501-supplement-5.pdf]

**A**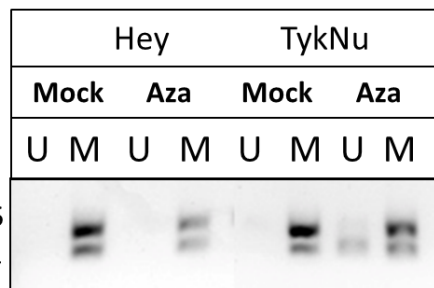**B TykNu**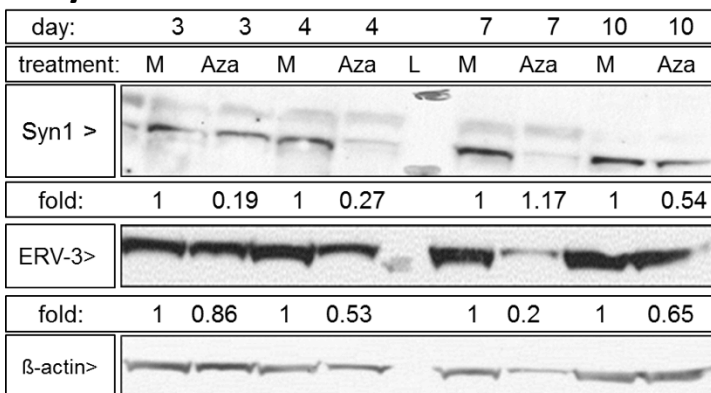**C Hey**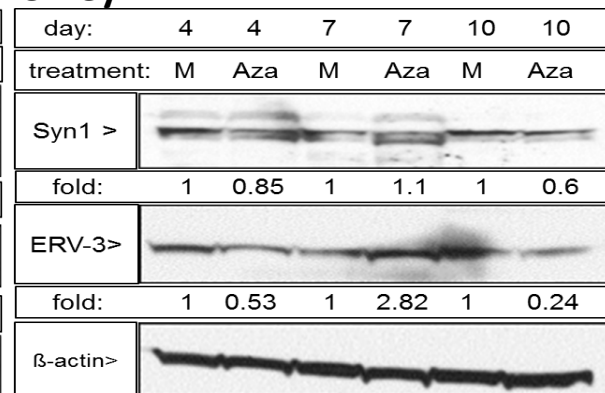**D**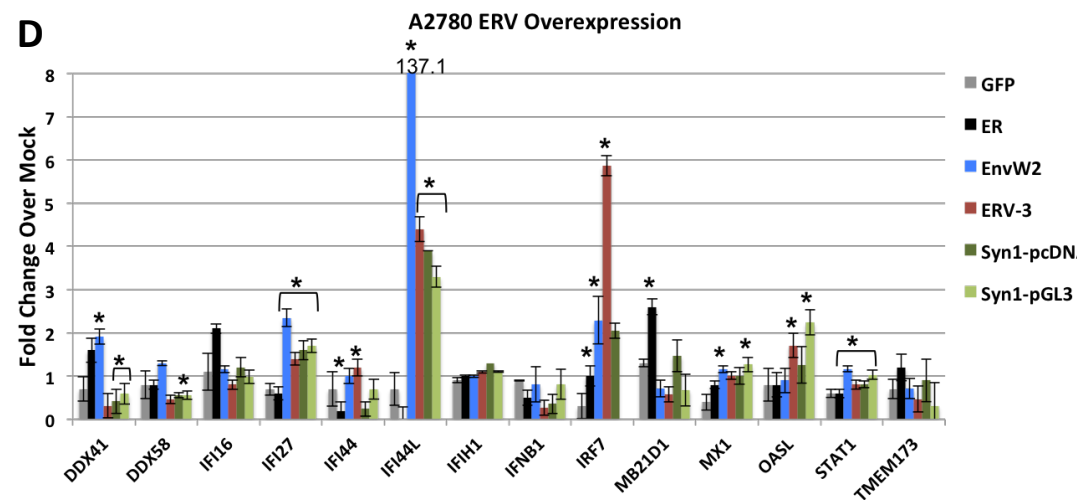**E**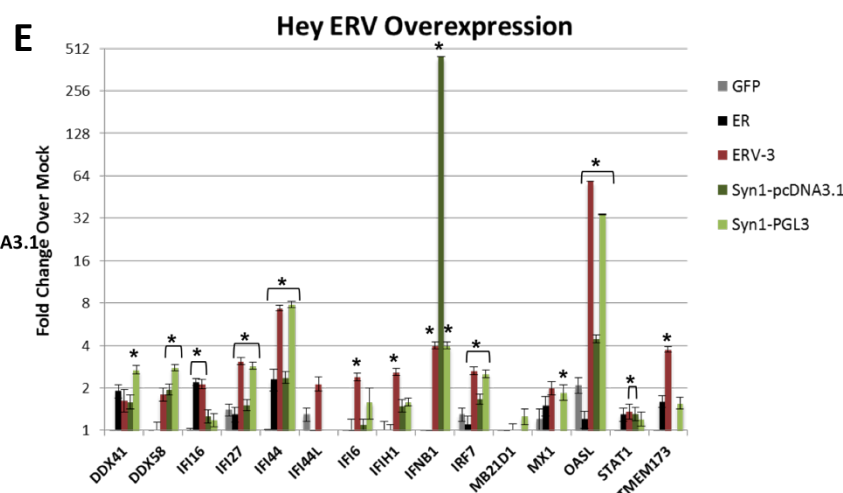**F**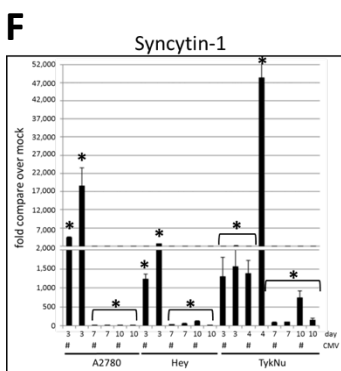**G**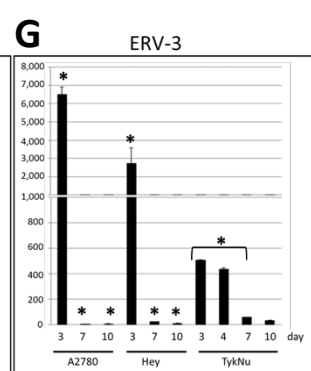**H**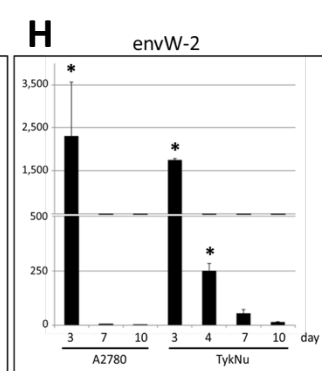**I**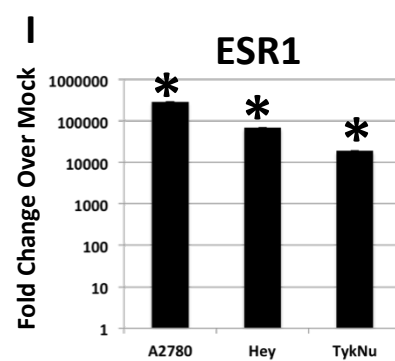**J**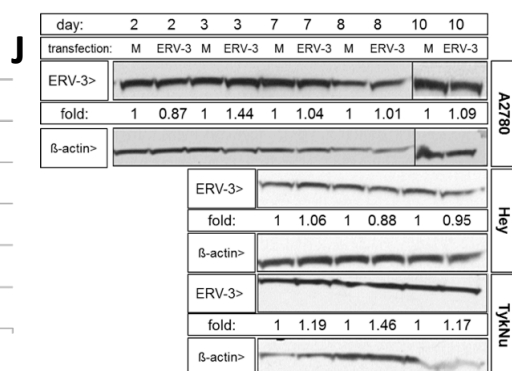

Supplement: NIHMS707501-supplement-6.pdf [file NIHMS707501-supplement-6.pdf]
